# Supplementary material for: Anaerobic Methanotrophic Archaea of the ANME-2d Cluster Are Active in a Low-sulfate, Iron-rich Freshwater Sediment
Source: PubMed Central journal article supplement (PMC5389135; doi:10.3389/fmicb.2017.00619), 2017-04-12
Supplement: Table_1.pdf [file Table_1.pdf]

*Supplementary:*

**Anaerobic methanotrophic archaea of the ANME-2d cluster are active in a low-sulfate, iron-rich freshwater sediment**

Hannah Sophia Weber<sup>1\*</sup>, Kirsten Silvia Habicht<sup>1,2</sup>, Bo Thamdrup<sup>1</sup>

<sup>1</sup>Nordic Center for Earth Evolution and Department of Biology, University of Southern Denmark, Odense, Dk

<sup>2</sup>Current address: Unisense A/S, Århus, Dk

**\*Corresponding author:** Hannah Sophia Weber (Hannah@biology.sdu.dk)

## 1 SR and AOM rates

In both control and  $^{13}\text{CH}_4$ - amended core incubations, sulfate reduction rates ranged from  $\sim 6 \pm 0.1$  to  $32 \pm 2 \text{ nmol cm}^{-3} \text{ day}^{-1}$  without showing a trend over time (Figure 2D). In the same cores, AOM rates were in the range of  $1 \pm 0.1$  to  $9 \pm 8 \text{ nmol cm}^{-3} \text{ day}^{-1}$ , whereas highest rates were measured in the first two time points and thus, AOM activity apparently decreased with time (Figure 2E). In slurry incubations, SR rates decreased over time both in control and  $^{13}\text{CH}_4$ -amended incubations from  $19 \pm 0.6 \text{ nmol cm}^{-3} \text{ day}^{-1}$  to  $1 \pm 0 \text{ nmol cm}^{-3} \text{ day}^{-1}$  (Figure 3D). AOM rates increased over time from the detection limit, reaching up to  $33 \pm 21 \text{ nmol cm}^{-3} \text{ day}^{-1}$  at day 72 (Figure 3E), and clearly exceeded SR rates at this last time point of the incubation.

Lake Ørn sediment is characterized by rapid iron-driven reoxidation processes and cryptic sulfur cycling involving microbial disproportionation of intermediate sulfur species (Norði *et al.*, 2013, Weber *et al.*, 2016). Therefore, microbially produced  $^{35}\text{S}$  sulfides were most likely partially reoxidized and SR rates may be underestimated several fold, thus reflecting net instead of gross rates (Moeslund *et al.*, 1994). At the same time, a previous Lake Ørn study (Norði *et al.*, 2013) proposed that methanogenesis was co-occurring with AOM in the AOM zone, which was also indicated in our incubations by relatively constant methane concentrations despite AOM activity and a slight net methane accumulation in the control incubations. Therefore, even though  $^{13}\text{C}_{\text{DIC}}$  produced by anaerobic methane oxidizers would have been diluted in a large DIC pool and consequently, the error should be relatively small, some of it could have been microbially re-converted to  $^{13}\text{CH}_4$ , causing an underestimation of AOM rates.

Therefore, SR and AOM rates presented here serve to confirm the activity of microbial sulfate reducers and anaerobic methane oxidizers. However, the magnitude of the rates as well as the corresponding SR:AOM ratio may be interpreted with caution.

## 2 Assessment of archaeal community by T-RFLP analyses

T-RFLP analyses were carried out for the same samples that were used to construct the 16S rRNA clone libraries with the aim to map the entire archaeal community. Operational taxonomic units (OTUs) obtained from T-RFLP analyses were then compared with true OTUs calculated from sequences from the 16S rRNA clone

libraries to gain an overview of the proportion of the taxonomically identified versus unidentified part of the archaeal community. A T-RF drift was observed between true T-RF lengths and observed T-RF lengths as described previously (Kaplan and Kitts, 2003), which resulted in this study in the addition of +1 bp between T-RFs obtained from 16S rRNA clone library derived T-RFs and observed T-RF lengths.

At incubation start, in slurry and core samples from layer 10 - 15 cm, the OTUs 93, 212 and 213 were strongly dominating in the T-RFLP results (Figures S3, Tables S1, S2). In the rRNA clone libraries, OTU 94 could be assigned to *Miscellaneous Crenarchaeotic Group*. The 16S rRNA clone libraries derived OTUs 213 and 214, on the other hand were shared by multiple groups, that were *Thermoplasmatales*, *Methanosaeta*, ANME-2d, *Aenigmarchaeota* and a crenarchaeotic unidentified (“others”) group. Further abundant at incubation start was the OTU 175 (176 in 16S rRNA clone library) that was assigned to *Thermoplasmatales*, *Miscellaneous Euryarchaeotic Group* or *Miscellaneous Crenarchaeotic Group*. The OTU pairs 181/182 and 266/267 were assigned to the crenarchaeotic unidentified (“others”) group, whereas both 236/237 and 238/238 fell into *Miscellaneous Crenarchaeotic Group*. Overall, a relatively big part of the archaeal community was identified for the incubation start, with 69 % and 77 % for the core and slurry, respectively, whereas several OTUs could not distinctively be assigned.

In the  $^{13}\text{CH}_4$  incubation, there was a substantial difference in the archaeal communities between the  $^{13}\text{C}$  and the  $^{12}\text{C}$  fraction regarding occurrences and relative abundances of OTUs. The  $^{13}\text{C}$  peak showed a clear dominance of the measured OTUs 213, 212, 175 and 176, which reached a total relative abundance of 77 %. The measured dominance of OTUs 213 and 212 matched the calculated OTUs obtained from sequences from 16S rRNA clone libraries and can be most likely taxonomically identified as members falling into the group ANME-2d. 16S rRNA sequences with OTUs 176 and 177 fell into the groups *Thermoplasmatales*, *Miscellaneous Euryarchaeotic Group* and *Miscellaneous Crenarchaeotic Group*. The OTUs 314, 266, 238, 153, 135 showed relative abundances of <5% each.

The T-RFLP analysis of the  $^{12}\text{C}$  peak of the same incubation showed a dominance of the OTUs 213, 212, 93 and 238, which covered together a relative abundance of 72 and 69 % respectively and were taxonomically assigned as described

above. The OTUs 153, 102, 271, 244 and 63 showed contributions to the relative abundance of 2-9 % each.

In the  $^{13}\text{C}_{\text{DIC}}$  slurry incubation, the  $^{13}\text{C}$  peak was clearly dominated by the OTUs 213 and 153, which reflected together 65 % of the relative abundances. As described above, the T-RFLP-derived OTU 213 can be assigned to 16S rRNA sequences of the groups *Thermoplasmatales*, *Methanosaeta*, *ANME-2d* and *Aenigmarchaeotia*, whereas OTU 153 could not be identified. The OTUs 161, 167, 175, 217, 238 and 314 showed relative abundances of 4-7 % each, but only OTU 238 could be aligned to a sequence with the OTU 239 obtained from the 16S rRNA clone library and identified as a member of *Miscellaneous Crenarchaeotic Group*. As in the  $^{13}\text{C}$  peak of the  $^{13}\text{CH}_4$  sample, also in the  $^{13}\text{C}$  peak of the  $^{13}\text{C}_{\text{DIC}}$  sample, OTU 93 was not detected in the T-RFLP analyses. In contrast, in the  $^{12}\text{C}$  peak of the  $^{13}\text{C}_{\text{DIC}}$  incubation, OTU 93 could be assigned to *Miscellaneous Crenarchaeotic Group* and was dominating with representing 43 % of the total archaeal community. Other dominating OTUs in this sample were OTU 213 and 212 representing 7 to 26 %, followed by 153, 238, 102, 171 and 233, which contributed to the relative abundance with 4-9 %.

The results of the T-RFLP analysis suggested that more taxonomical units may potentially assimilate methane and/or bicarbonate than indicated by the 16S rRNA clone libraries or that cross-feeding of  $^{13}\text{C}$ -labeled metabolites occurred.

### **3 Identified archaea in AOM zone**

The 16S rRNA clone libraries and the T-RFLP analysis provided further information about diversity and identities of archaea that were – besides members of ANME-2d – active in the AOM zone of Lake Ørn sediment. The identified groups were (1) *Thermoplasmatales*, (2) *Methanosaeta*, (3) *Methanolinea* and (4) *Miscellaneous Crenarchaeotic Group*.

The lineage *Thermoplasmatales* showed a high contribution to the RNA pool at incubation start in the AOM zone of Lake Ørn sediment. Previously, *Thermoplasmatales* were found in numerous freshwater and marine habitats (e.g., Webster et al., 2011) but their metabolisms are largely unknown and likely as diverse as the group itself. Due to its occurrence in AOM-active areas, a subgroup of *Thermoplasmatales*, named *Marine Benthic Group D* was suggested to be involved in

methane cycling (Beal et al., 2009; Schubert et al., 2011; Webster et al., 2011). Another diverse and widespread genus in methanogenic environments is *Methanosaeta*, a group of obligate acetoclastic methanogens (Mori et al., 2012). *Methanosaeta* has never been shown to hold the capacity to oxidize methane, but members of the group own the complete complement of genes necessary for the reduction of carbon dioxide to methane (Rotaru et al., 2014) and is therefore likely to be part of the methanogenic community in Lake Ørn. Members of the novel family *Methanolinea* were classified as H<sub>2</sub>/CO<sub>2</sub>-using methanogens and were found in various anaerobic environments, including lake sediment (Bräuer et al., 2006; Sakai et al., 2009, 2012). Even though *Methanolinea* were not retrieved in samples from the incubation start, the groups' activity was represented by two 16S rRNA sequences that were retrieved from the <sup>13</sup>C fraction of the <sup>13</sup>C<sub>DIC</sub> incubation. Members of *Miscellaneous Crenarchaeotic Group* were found in high amounts at incubation start and a significant amount of <sup>13</sup>C-labeled sequences of the group were retrieved from the <sup>13</sup>C<sub>DIC</sub> incubations. Genomes of phylum members of this group contain genes necessary for methane metabolism and anaerobic methane oxidation was proposed as possible metabolism due to significant abundances in AOM-active environments (Evans et al., 2015). In Lake Ørn, the <sup>13</sup>C-labeling of sequences assigned to *Miscellaneous Crenarchaeotic Group* indicated autotrophy.

#### 4 References

- Beal, E. J., House, C. H., and Orphan, V. J. (2009). Manganese- and iron-dependent marine methane oxidation. *Science* (80-). 325, 184–187. doi:10.1126/science.1169984.
- Bräuer, S. L., Cadillo-Quiroz, H., Yashiro, E., Yavitt, J. B., and Zinder, S. H. (2006). Isolation of a novel acidiphilic methanogen from an acidic peat bog. *Nature* 442, 192–194. doi:10.1038/nature04810.
- Evans, P. N., Parks, D. H., Chadwick, G. L., Robbins, S. J., Orphan, V. J., Golding, S. D., et al. (2015). Methane metabolism in the archaeal phylum *Bathyarchaeota* revealed by genome-centric metagenomics. *Sci. Reports* 350, 434–438.
- Kaplan, C. W., and Kitts, C. L. (2003). Variation between observed and true Terminal Restriction Fragment length is dependent on true TRF length and purine content. *J. Microbiol. Methods* 54, 121–125. doi:10.1016/S0167-7012(03)00003-4.
- Moeslund, L., Thamdrup, B., and Jørgensen, B. B. (1994). Sulfur and iron cycling in a coastal sediment: Radiotracer studies and seasonal dynamics. *Biogeochemistry* 27, 129–152.
- Mori, K., Lino, T., Suzuki, K.-I., Yamaguchi, K., and Kamagata, Y. (2012). Aceticlastic and NaCl-requiring methanogen *Methanosaeta pelagica* sp. nov., isolated from marine tidal flat sediment. *Appl. Environ. Microbiol.* 78, 3416–3423. doi:10.1128/AEM.07484-11.
- Norđi, K. Á., Thamdrup, B., and Schubert, C. J. (2013). Anaerobic oxidation of methane in an iron-rich Danish freshwater lake sediment. *Limnol. Oceanogr.* 58, 546–554. doi:10.4319/lo.2013.58.2.0546.
- Rotaru, A.-E., Shrestha, P. M., Liu, F., Shrestha, M., Shrestha, D., Embree, M., et al. (2014). A new model for electron flow during anaerobic digestion: direct interspecies electron transfer to *Methanosaeta* for the reduction of carbon dioxide to methane. *Energy Environ. Sci.* 7, 408–415. doi:10.1039/c3ee42189a.
- Sakai, S., Ehara, M., Tseng, I.-C., Yamaguchi, T., Bräuer, S. L., Cadillo-Quiroz, H., et al. (2012). *Methanolinea mesophila* sp. nov., a hydrogenotrophic methanogen isolated from rice field soil, and proposal of the archaeal family *Methanoregulaceae* fam. nov. within the order *Methanomicrobiales*. *Int. J. Syst. Evol. Microbiol.* 62, 1389–1395. doi:10.1099/ijs.0.035048-0.
- Sakai, S., Imachi, H., Sekiguchi, Y., Tseng, I.-C., Ohashi, A., Harada, H., et al. (2009). Cultivation of methanogens under low-hydrogen conditions by using the coculture method. *Appl. Environ. Microbiol.* 75, 4892–4896. doi:10.1128/AEM.02835-08.
- Schubert, C. J., Vazquez, F., Lösekann-Behrens, T., Knittel, K., Tonolla, M., and Boetius, A. (2011). Evidence for anaerobic oxidation of methane in sediments of a freshwater system (Lago Di Cadagno). *FEMS Microbiol. Ecol.* 76, 26–38. doi:10.1111/j.1574-6941.2010.01036.x.
- Webster, G., Sass, H., Cragg, B. A., Gorra, R., Knab, N. J., Green, C. J., et al. (2011). Enrichment and cultivation of prokaryotes associated with the sulphate-methane transition zone of diffusion-controlled sediments of Aarhus Bay, Denmark, under heterotrophic conditions. *FEMS Microbiol. Ecol.* 77, 248–263. doi:10.1111/j.1574-6941.2011.01109.x.

## 5 Figures and Tables

CORE INCUBATIONS:

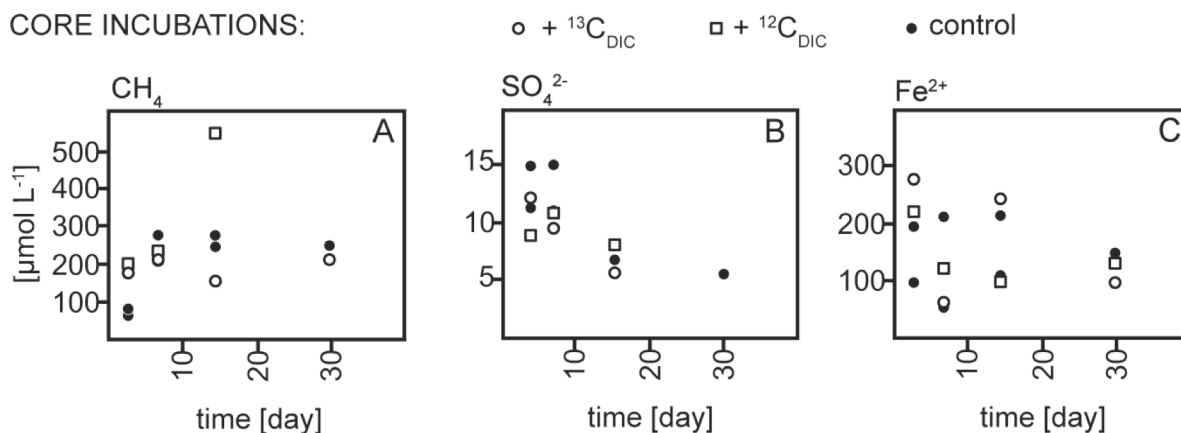

**Figure S1.** Concentrations over time of (A) methane ( $\text{CH}_4$ ), (B) sulfate ( $\text{SO}_4^{2-}$ ), and (C) dissolved iron ( $\text{Fe}^{2+}$ ) in  $^{13}\text{C}_{\text{DIC}}$ ,  $^{12}\text{C}_{\text{DIC}}$  and control core incubations.

SLURRY INCUBATIONS:

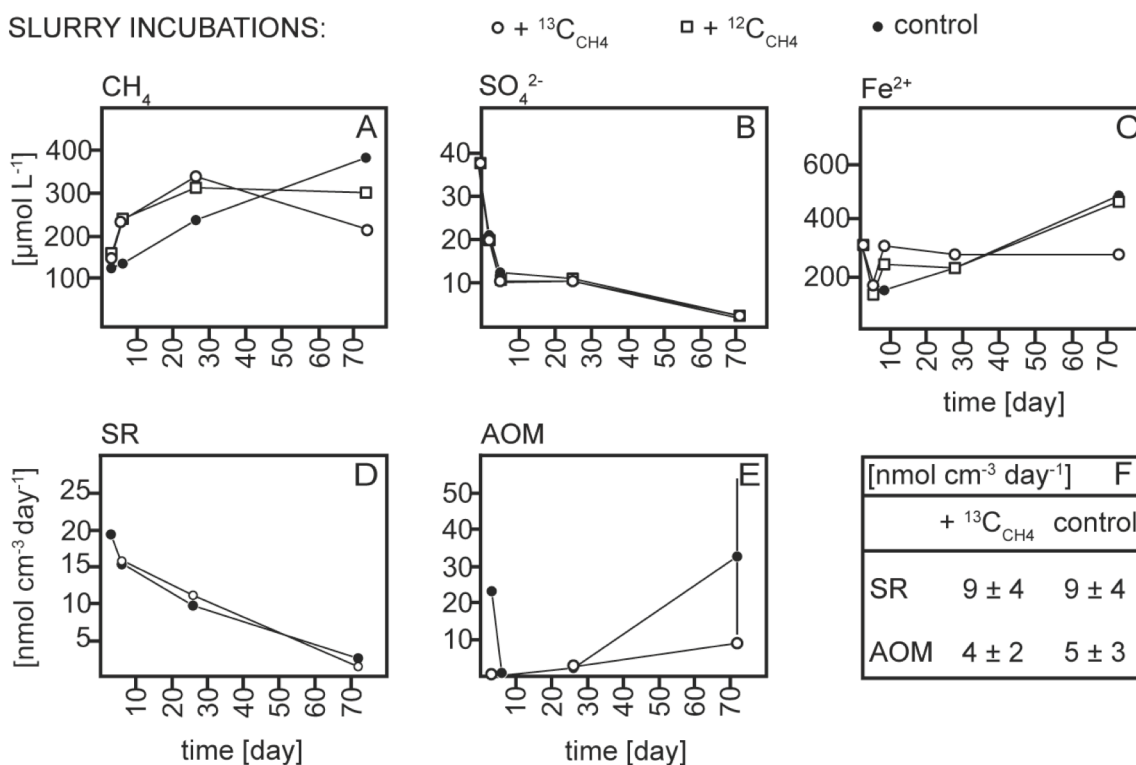

**Figure S2.** Concentrations over time of (A) methane ( $\text{CH}_4$ ), (B) sulfate ( $\text{SO}_4^{2-}$ ), and (C) dissolved iron ( $\text{Fe}^{2+}$ ), rates over time of (D) sulfate reduction (SR), and (E) anaerobic methane oxidation (AOM) in  $^{13}\text{C}_{\text{CH}_4}$ ,  $^{12}\text{C}_{\text{CH}_4}$  and control slurry incubations and (F) average rates of SR and AOM in  $^{13}\text{C}_{\text{CH}_4}$  and control slurry incubations.

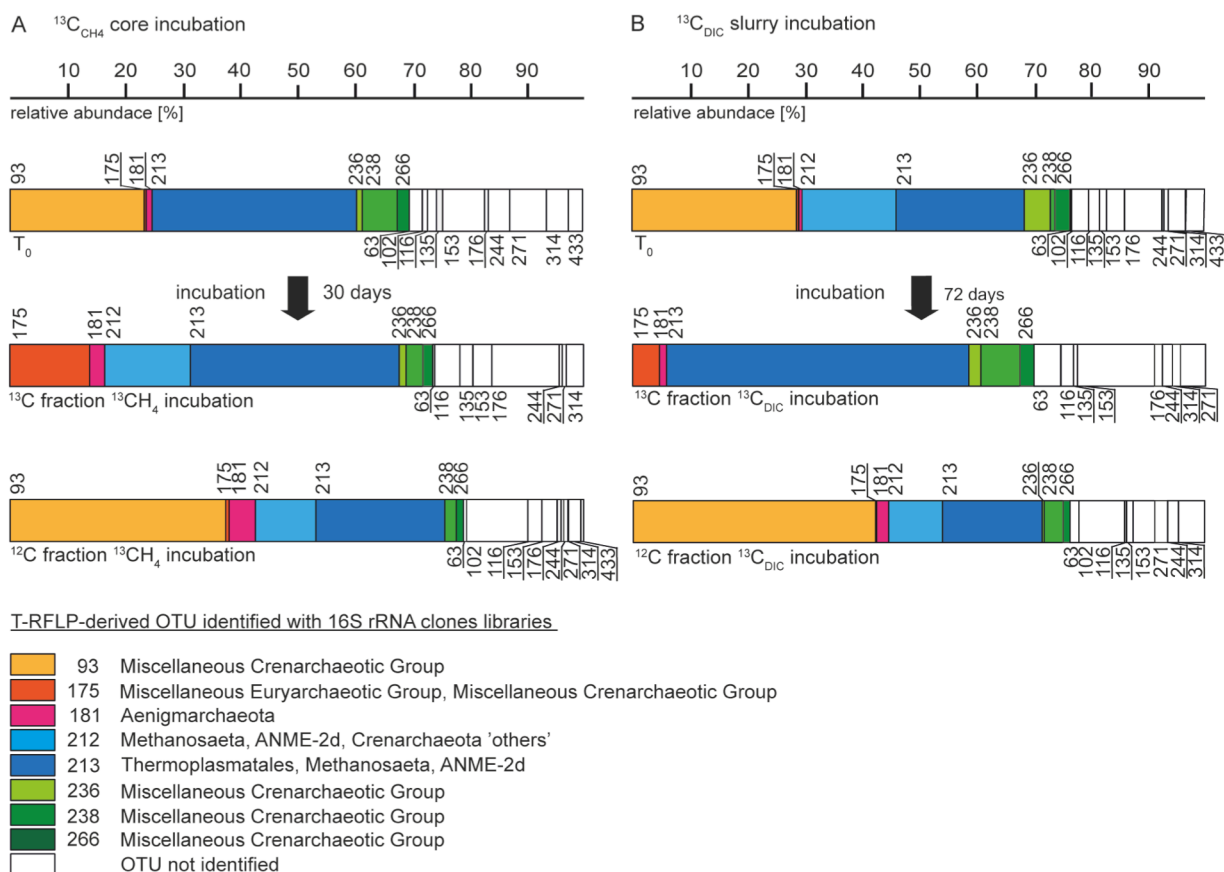

**Figure S3.** Relative abundances (%) of Operational Taxonomic Units (OTUs) obtained from T-RFLP analysis and OTU identification with 16S rRNA clone libraries: (A)  $T_0$ ,  $^{13}\text{C}$  and  $^{12}\text{C}$  fraction of  $^{13}\text{C}_{\text{CH}_4}$  core incubation and (B)  $T_0$ ,  $^{13}\text{C}$  and  $^{12}\text{C}$  fraction of  $^{13}\text{C}_{\text{DIC}}$  slurry incubation.

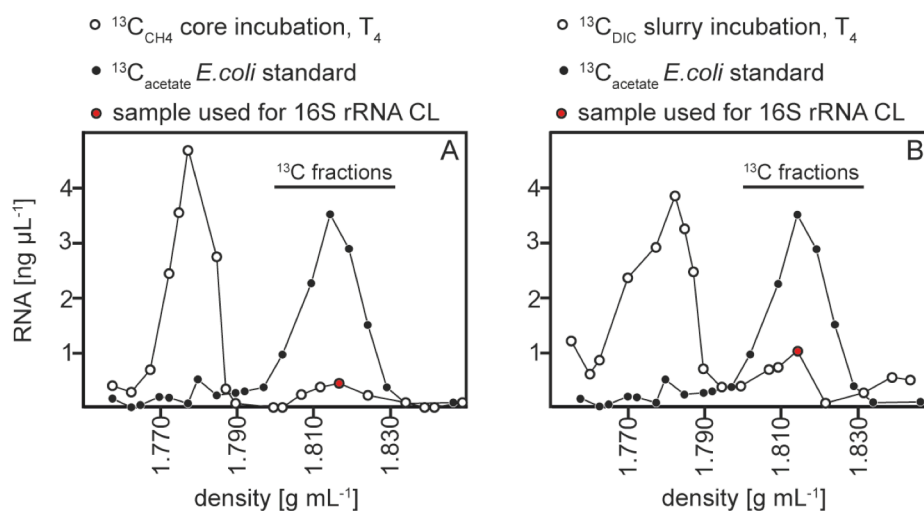

**Figure S4:** Caesium trifluoroacetate (CsTFA) density gradients of (A)  $^{13}\text{C}_{\text{CH}_4}$  core incubation at  $T_4$  with  $^{13}\text{C}_{\text{acetate}}$  *E. coli* standard and (B)  $^{13}\text{C}_{\text{DIC}}$  slurry incubation at  $T_4$  with  $^{13}\text{C}_{\text{acetate}}$  *E. coli* standard; fractions indicated by red circles were used to construct 16S rRNA clone libraries.



**Table S1.** Taxonomic affiliation, numbers and operational taxonomical units (OTUs) of sequences obtained from 16S rRNA clone libraries at incubation start (T<sub>0</sub>) for one representative sample of <sup>13</sup>C<sub>CH4</sub> and <sup>13</sup>C<sub>DIC</sub> incubations, each from the <sup>13</sup>C fraction and the <sup>12</sup>C fraction of the same CsTFA gradients.

| Taxonomic affiliation                     | OTU  | T <sub>0</sub> | <sup>13</sup> C <sub>CH4</sub><br><sup>13</sup> C | core<br><sup>12</sup> C | <sup>13</sup> C <sub>DIC</sub><br><sup>13</sup> C | slurry<br><sup>12</sup> C |
|-------------------------------------------|------|----------------|---------------------------------------------------|-------------------------|---------------------------------------------------|---------------------------|
| <b>EURYARCHAEOTA</b>                      | 21   | 3              |                                                   | 1                       |                                                   |                           |
| <i>Thermoplasmata</i>                     | 69   |                |                                                   | 1                       | 1                                                 |                           |
| <i>Thermoplasmatales</i>                  | 70   | 1              |                                                   | 1                       |                                                   |                           |
|                                           | 155  | 5              |                                                   |                         |                                                   | 1                         |
|                                           | 156  | 1              |                                                   | 1                       |                                                   | 1                         |
|                                           | 176  | 1              |                                                   |                         |                                                   |                           |
|                                           | 180  |                |                                                   |                         |                                                   | 1                         |
|                                           | 206  |                |                                                   |                         |                                                   | 1                         |
|                                           | 207  | 1              |                                                   |                         |                                                   |                           |
|                                           | 209  | 1              |                                                   |                         |                                                   |                           |
|                                           | 214  | 4              |                                                   | 3                       | 1                                                 | 1                         |
|                                           | n.i. | 2              |                                                   | 1                       |                                                   | 1                         |
| <i>Methanomicrobia</i>                    | 213  | 2              | 2                                                 | 1                       | 3                                                 |                           |
| <i>Methanosarcinales</i>                  | 214  |                | 1                                                 |                         |                                                   |                           |
| <i>Methanosaetacea</i>                    | n.i. | 1              |                                                   |                         |                                                   |                           |
| <b><i>Methanosaeta</i></b>                |      |                |                                                   |                         |                                                   |                           |
| <i>Methanomicrobia</i>                    | 213  |                | 3                                                 |                         |                                                   |                           |
| <i>Methanosarcinales</i>                  | 214  | 6              | 16                                                | 1                       | 16                                                |                           |
| <b><i>ANME-2d</i></b>                     | 215  |                | 2                                                 |                         |                                                   |                           |
|                                           | n.i. | 3              | 1                                                 |                         | 1                                                 |                           |
| <i>Methanomicrobia</i>                    | 21   |                |                                                   |                         | 2                                                 |                           |
| <i>Methanomicrobiales</i>                 |      |                |                                                   |                         |                                                   |                           |
| <i>Methanoregulacea/Methanolinea</i>      |      |                |                                                   |                         |                                                   |                           |
| <b>MISCELLANEOUS EURYARCHAEOTIC GROUP</b> | 159  |                |                                                   | 1                       |                                                   |                           |
|                                           | 176  |                |                                                   | 1                       |                                                   |                           |
|                                           | 288  | 1              |                                                   | 3                       |                                                   | 3                         |
|                                           | 328  |                |                                                   |                         |                                                   | 1                         |
|                                           | 330  |                |                                                   | 1                       |                                                   |                           |
|                                           | n.i. | 1              |                                                   |                         |                                                   | 1                         |
| <b>AENIGMARCHAEOTA</b>                    | 181  |                |                                                   |                         |                                                   | 1                         |
|                                           | 195  | 1              |                                                   |                         |                                                   | 1                         |
|                                           | 154  |                |                                                   | 1                       |                                                   |                           |
|                                           | 215  |                |                                                   | 1                       |                                                   |                           |
|                                           | 485  |                |                                                   |                         |                                                   | 1                         |
|                                           | n.i. | 1              |                                                   |                         |                                                   |                           |
| <b>CRENARCHAEOTA</b>                      |      |                |                                                   |                         |                                                   |                           |
| Marine Benthic Group B                    | 292  |                | 1                                                 |                         |                                                   |                           |
| others                                    | 182  | 1              |                                                   |                         |                                                   |                           |
|                                           | 213  | 1              |                                                   |                         |                                                   |                           |
|                                           | 243  |                |                                                   | 1                       |                                                   |                           |
|                                           | 267  |                |                                                   |                         |                                                   | 1                         |
| <b>MISCELLANEOUS CRENARCHAEOTIC GROUP</b> | 94   |                |                                                   |                         |                                                   | 1                         |
|                                           | 151  | 1              |                                                   |                         |                                                   |                           |
|                                           | 174  | 1              |                                                   | 1                       |                                                   | 2                         |
|                                           | 176  |                |                                                   | 1                       |                                                   |                           |
|                                           | 237  | 4              |                                                   |                         |                                                   | 1                         |
|                                           | 238  | 3              |                                                   | 3                       |                                                   | 3                         |
|                                           | 239  | 2              | 1                                                 | 8                       | 3                                                 | 7                         |
|                                           | 240  | 1              |                                                   | 1                       |                                                   | 1                         |
|                                           | 241  | 1              |                                                   | 1                       |                                                   |                           |
|                                           | 242  |                |                                                   | 1                       |                                                   |                           |
|                                           | 244  | 4              |                                                   | 1                       |                                                   | 1                         |
|                                           | 266  | 1              |                                                   |                         |                                                   |                           |
|                                           | 268  | 1              |                                                   |                         |                                                   |                           |
|                                           | 270  |                |                                                   |                         |                                                   | 2                         |
|                                           | 271  | 1              |                                                   | 2                       |                                                   | 1                         |
|                                           | 297  |                |                                                   |                         | 1                                                 |                           |
|                                           | 342  |                |                                                   |                         |                                                   | 1                         |
|                                           | n.i. | 20             |                                                   | 2                       | 1                                                 | 1                         |

**Table S2.** Relative abundances (%) of Operational Taxonomical Units (OTUs) obtained from T-RFLP analysis at incubation start ( $T_0$  core and slurry) and for one representative sample of the  $^{13}\text{C}$  fraction and the  $^{12}\text{C}$  fraction of the same CsTFA gradient of the  $^{13}\text{C}_{\text{CH}_4}$  and  $^{13}\text{C}_{\text{DIC}}$  incubations, respectively.

| OTU | $T_0$ core (%) | $T_0$ slurry (%) | $^{13}\text{C}_{\text{CH}_4}$                               | $^{12}\text{C}_{\text{CH}_4}$                               | $^{13}\text{C}_{\text{DIC}}$                               | $^{12}\text{C}_{\text{DIC}}$                               |
|-----|----------------|------------------|-------------------------------------------------------------|-------------------------------------------------------------|------------------------------------------------------------|------------------------------------------------------------|
|     |                |                  | fraction<br>$^{13}\text{C}_{\text{CH}_4}$<br>incubation (%) | fraction<br>$^{13}\text{C}_{\text{CH}_4}$<br>incubation (%) | fraction<br>$^{13}\text{C}_{\text{DIC}}$<br>incubation (%) | fraction<br>$^{13}\text{C}_{\text{DIC}}$<br>incubation (%) |
| 116 | 2              | 1                | 4                                                           | 0                                                           | 4                                                          | 0                                                          |
| 135 | 1              | 3                | 2                                                           | 0                                                           | 1                                                          | 1                                                          |
| 181 | 1              | 0                | 3                                                           | 5                                                           | 1                                                          | 2                                                          |
| 433 | 3              | 3                | 0                                                           | 2                                                           | 0                                                          | 0                                                          |
| 244 | 4              | 0                | 0                                                           | 1                                                           | 2                                                          | 2                                                          |
| 236 | 1              | 5                | 1                                                           | 0                                                           | 2                                                          | 0                                                          |
| 63  | 2              | 3                | 0                                                           | 1                                                           | 0                                                          | 2                                                          |
| 266 | 2              | 3                | 2                                                           | 1                                                           | 2                                                          | 1                                                          |
| 176 | 0              | 0                | 12                                                          | 1                                                           | 5                                                          | 0                                                          |
| 175 | 0              | 0                | 14                                                          | 1                                                           | 5                                                          | 0                                                          |
| 271 | 7              | 1                | 1                                                           | 1                                                           | 3                                                          | 4                                                          |
| 314 | 4              | 3                | 3                                                           | 2                                                           | 4                                                          | 3                                                          |
| 102 | 1              | 2                | 0                                                           | 11                                                          | 0                                                          | 8                                                          |
| 238 | 6              | 1                | 3                                                           | 2                                                           | 7                                                          | 4                                                          |
| 153 | 7              | 7                | 3                                                           | 3                                                           | 13                                                         | 4                                                          |
| 212 | 0              | 16               | 15                                                          | 11                                                          | 0                                                          | 10                                                         |
| 93  | 23             | 29               | 0                                                           | 37                                                          | 0                                                          | 43                                                         |
| 213 | 35             | 23               | 36                                                          | 22                                                          | 51                                                         | 16                                                         |

**Table S3:** Gene Bank Identification of Lake Ørn 16S rRNA sequences: sequence IDs, clone IDs, organism, incubation/treatment/source and accession number.

| Sequence ID | Clone ID | Organism                     | Incubation/treatment/source | Accession number |
|-------------|----------|------------------------------|-----------------------------|------------------|
| T0core_1    | C1       | uncultured Crenarchaeote     | T0 core                     | KX463203         |
| T0core_2    | C2       | uncultured Crenarchaeote     | T0 core                     | KX463211         |
| T0core_3    | C3       | uncultured Thermoplasmatales | T0 core                     | KX463217         |
| T0core_5    | C5       | uncultured Crenarchaeote     | T0 core                     | KX463227         |
| T0core_6    | C6       | uncultured Crenarchaeote     | T0 core                     | KX463228         |
| T0core_7    | C7       | uncultured Crenarchaeote     | T0 core                     | KX463229         |
| T0core_8    | C8       | uncultured Crenarchaeote     | T0 core                     | KX463230         |
| T0core_10   | C10      | uncultured Crenarchaeote     | T0 core                     | KX463195         |
| T0core_12   | C12      | uncultured Crenarchaeote     | T0 core                     | KX463196         |
| T0core_13   | C13      | uncultured Crenarchaeote     | T0 core                     | KX463197         |
| T0core_14   | C14      | uncultured Thermoplasmatales | T0 core                     | KX463198         |
| T0core_15   | C15      | uncultured Crenarchaeote     | T0 core                     | KX463199         |
| T0core_16   | C16      | uncultured Crenarchaeote     | T0 core                     | KX463200         |
| T0core_18   | C18      | uncultured Crenarchaeote     | T0 core                     | KX463201         |
| T0core_19   | C19      | uncultured Crenarchaeote     | T0 core                     | KX463202         |
| T0core_22   | C22      | uncultured Crenarchaeote     | T0 core                     | KX463204         |
| T0core_23   | C23      | uncultured Thermoplasmatales | T0 core                     | KX463205         |
| T0core_24   | C24      | uncultured Crenarchaeote     | T0 core                     | KX463206         |
| T0core_25   | C25      | uncultured Crenarchaeote     | T0 core                     | KX463207         |
| T0core_27   | C27      | uncultured Thermoplasmatales | T0 core                     | KX463208         |
| T0core_28   | C28      | uncultured Thermoplasmatales | T0 core                     | KX463209         |
| T0core_29   | C29      | uncultured Crenarchaeote     | T0 core                     | KX463210         |
| T0core_31   | C31      | uncultured Archaeon          | T0 core                     | KX463212         |
| T0core_32   | C32      | uncultured Thermoplasmatales | T0 core                     | KX463213         |
| T0core_33   | C33      | uncultured Thermoplasmatales | T0 core                     | KX463214         |
| T0core_38   | C38      | uncultured Thermoplasmatales | T0 core                     | KX463215         |

|             |     |                              |           |          |
|-------------|-----|------------------------------|-----------|----------|
| T0core_39   | C39 | uncultured Thermoplasmatales | T0 core   | KX463216 |
| T0core_43   | C43 | uncultured Crenarchaeote     | T0 core   | KX463218 |
| T0core_44   | C44 | ANME-2d cluster              | T0 core   | KX463219 |
| T0core_45   | C45 | uncultured Crenarchaeote     | T0 core   | KX463220 |
| T0core_46   | C46 | uncultured Crenarchaeote     | T0 core   | KX463221 |
| T0core_47   | C47 | uncultured Crenarchaeote     | T0 core   | KX463222 |
| T0core_48   | C48 | uncultured Crenarchaeote     | T0 core   | KX463223 |
| T0core_51   | C51 | uncultured Archaeon          | T0 core   | KX463224 |
| T0core_52   | C52 | uncultured Thermoplasmatales | T0 core   | KX463225 |
| T0core_54   | C54 | uncultured Thermoplasmatales | T0 core   | KX463226 |
| T0slurry_1  | S1  | uncultured Thermoplasmatales | T0 slurry | KX463239 |
| T0slurry_3  | S3  | ANME-2d cluster              | T0 slurry | KX463253 |
| T0slurry_4  | S4  | uncultured Methanosaeta      | T0 slurry | KX463262 |
| T0slurry_5  | S5  | ANME-2d cluster              | T0 slurry | KX463267 |
| T0slurry_6  | S6  | uncultured Crenarchaeote     | T0 slurry | KX463269 |
| T0slurry_10 | S10 | uncultured Crenarchaeote     | T0 slurry | KX463231 |
| T0slurry_12 | S12 | uncultured Crenarchaeote     | T0 slurry | KX463232 |
| T0slurry_13 | S13 | ANME-2d cluster              | T0 slurry | KX463233 |
| T0slurry_14 | S14 | uncultured Thermoplasmatales | T0 slurry | KX463234 |
| T0slurry_15 | S15 | uncultured Crenarchaeote     | T0 slurry | KX463235 |
| T0slurry_16 | S16 | uncultured Archaeon          | T0 slurry | KX463236 |
| T0slurry_17 | S17 | uncultured Crenarchaeote     | T0 slurry | KX463237 |
| T0slurry_19 | S19 | uncultured Crenarchaeote     | T0 slurry | KX463238 |
| T0slurry_20 | S20 | uncultured Archaeon          | T0 slurry | KX463240 |
| T0slurry_21 | S21 | ANME-2d cluster              | T0 slurry | KX463241 |
| T0slurry_23 | S23 | uncultured Thermoplasmatales | T0 slurry | KX463242 |
| T0slurry_24 | S24 | uncultured Thermoplasmatales | T0 slurry | KX463243 |
| T0slurry_28 | S28 | uncultured Crenarchaeote     | T0 slurry | KX463244 |

|                       |      |                              |                                                                  |          |
|-----------------------|------|------------------------------|------------------------------------------------------------------|----------|
| T0slurry_29           | S29  | uncultured Methanosaeta      | T0 slurry                                                        | KX463245 |
| T0slurry_30           | S30  | uncultured Crenarchaeote     | T0 slurry                                                        | KX463246 |
| T0slurry_31           | S31  | uncultured Thermoplasmatales | T0 slurry                                                        | KX463247 |
| T0slurry_33           | S33  | uncultured Crenarchaeote     | T0 slurry                                                        | KX463248 |
| T0slurry_35           | S35  | ANME-2d cluster              | T0 slurry                                                        | KX463249 |
| T0slurry_36           | S36  | ANME-2d cluster              | T0 slurry                                                        | KX463250 |
| T0slurry_38           | S38  | uncultured Archaeon          | T0 slurry                                                        | KX463251 |
| T0slurry_39           | S39  | uncultured Crenarchaeote     | T0 slurry                                                        | KX463252 |
| T0slurry_42           | S42  | uncultured Methanosaeta      | T0 slurry                                                        | KX463254 |
| T0slurry_43           | S43  | uncultured Crenarchaeote     | T0 slurry                                                        | KX463255 |
| T0slurry_44           | S44  | uncultured Crenarchaeote     | T0 slurry                                                        | KX463256 |
| T0slurry_45           | S45  | ANME-2d cluster              | T0 slurry                                                        | KX463257 |
| T0slurry_46           | S46  | uncultured Crenarchaeote     | T0 slurry                                                        | KX463258 |
| T0slurry_47           | S47  | uncultured Archaeon          | T0 slurry                                                        | KX463259 |
| T0slurry_48           | S48  | uncultured Thermoplasmatales | T0 slurry                                                        | KX463260 |
| T0slurry_49           | S49  | uncultured Thermoplasmatales | T0 slurry                                                        | KX463261 |
| T0slurry_51           | S51  | uncultured Crenarchaeote     | T0 slurry                                                        | KX463263 |
| T0slurry_53           | S53  | uncultured Crenarchaeote     | T0 slurry                                                        | KX463264 |
| T0slurry_55           | S55  | uncultured Archaeon          | T0 slurry                                                        | KX463265 |
| T0slurry_59           | S59  | uncultured Crenarchaeote     | T0 slurry                                                        | KX463266 |
| T0slurry_60           | S60  | uncultured Crenarchaeote     | T0 slurry                                                        | KX463268 |
| 13Cpeak_13CH4incub_3  | AA3  | ANME-2d cluster              | <sup>13</sup> C peak in <sup>13</sup> CH <sub>4</sub> incubation | KX463072 |
| 13Cpeak_13CH4incub_5  | AA5  | ANME-2d cluster              | <sup>13</sup> C peak in <sup>13</sup> CH <sub>4</sub> incubation | KX463077 |
| 13Cpeak_13CH4incub_10 | AA10 | uncultured Archaeon          | <sup>13</sup> C peak in <sup>13</sup> CH <sub>4</sub> incubation | KX463063 |
| 13Cpeak_13CH4incub_12 | AA12 | ANME-2d cluster              | <sup>13</sup> C peak in <sup>13</sup> CH <sub>4</sub> incubation | KX463064 |
| 13Cpeak_13CH4incub_18 | AA18 | ANME-2d cluster              | <sup>13</sup> C peak in <sup>13</sup> CH <sub>4</sub> incubation | KX463065 |
| 13Cpeak_13CH4incub_26 | AA26 | ANME-2d cluster              | <sup>13</sup> C peak in <sup>13</sup> CH <sub>4</sub> incubation | KX463066 |
| 13Cpeak_13CH4incub_30 | AA30 | ANME-2d cluster              | <sup>13</sup> C peak in <sup>13</sup> CH <sub>4</sub> incubation | KX463067 |

|                       |      |                              |                                                                  |          |
|-----------------------|------|------------------------------|------------------------------------------------------------------|----------|
| 13Cpeak_13CH4incub_31 | AA31 | uncultured Methanosaeta      | <sup>13</sup> C peak in <sup>13</sup> CH <sub>4</sub> incubation | KX463068 |
| 13Cpeak_13CH4incub_32 | AA32 | ANME-2d cluster              | <sup>13</sup> C peak in <sup>13</sup> CH <sub>4</sub> incubation | KX463069 |
| 13Cpeak_13CH4incub_35 | AA35 | ANME-2d cluster              | <sup>13</sup> C peak in <sup>13</sup> CH <sub>4</sub> incubation | KX463070 |
| 13Cpeak_13CH4incub_37 | AA37 | uncultured Crenarchaeote     | <sup>13</sup> C peak in <sup>13</sup> CH <sub>4</sub> incubation | KX463071 |
| 13Cpeak_13CH4incub_41 | AA41 | ANME-2d cluster              | <sup>13</sup> C peak in <sup>13</sup> CH <sub>4</sub> incubation | KX463073 |
| 13Cpeak_13CH4incub_45 | AA45 | ANME-2d cluster              | <sup>13</sup> C peak in <sup>13</sup> CH <sub>4</sub> incubation | KX463074 |
| 13Cpeak_13CH4incub_46 | AA46 | ANME-2d cluster              | <sup>13</sup> C peak in <sup>13</sup> CH <sub>4</sub> incubation | KX463075 |
| 13Cpeak_13CH4incub_53 | AA53 | ANME-2d cluster              | <sup>13</sup> C peak in <sup>13</sup> CH <sub>4</sub> incubation | KX463076 |
| 13Cpeak_13CH4incub_63 | AA63 | ANME-2d cluster              | <sup>13</sup> C peak in <sup>13</sup> CH <sub>4</sub> incubation | KX463078 |
| 13Cpeak_13CH4incub_64 | AA64 | ANME-2d cluster              | <sup>13</sup> C peak in <sup>13</sup> CH <sub>4</sub> incubation | KX463079 |
| 13Cpeak_13CH4incub_65 | AA56 | ANME-2d cluster              | <sup>13</sup> C peak in <sup>13</sup> CH <sub>4</sub> incubation | KX463080 |
| 13Cpeak_13CH4incub_71 | AA71 | ANME-2d cluster              | <sup>13</sup> C peak in <sup>13</sup> CH <sub>4</sub> incubation | KX463081 |
| 13Cpeak_13CH4incub_72 | AA72 | ANME-2d cluster              | <sup>13</sup> C peak in <sup>13</sup> CH <sub>4</sub> incubation | KX463082 |
| 13Cpeak_13CH4incub_74 | AA74 | uncultured Methanosaeta      | <sup>13</sup> C peak in <sup>13</sup> CH <sub>4</sub> incubation | KX463083 |
| 13Cpeak_13CH4incub_80 | AA80 | ANME-2d cluster              | <sup>13</sup> C peak in <sup>13</sup> CH <sub>4</sub> incubation | KX463084 |
| 13Cpeak_13CH4incub_84 | AA84 | ANME-2d cluster              | <sup>13</sup> C peak in <sup>13</sup> CH <sub>4</sub> incubation | KX463085 |
| 13Cpeak_13CH4incub_89 | AA89 | ANME-2d cluster              | <sup>13</sup> C peak in <sup>13</sup> CH <sub>4</sub> incubation | KX463086 |
| 13Cpeak_13CH4incub_91 | AA91 | ANME-2d cluster              | <sup>13</sup> C peak in <sup>13</sup> CH <sub>4</sub> incubation | KX463087 |
| 13Cpeak_13CH4incub_93 | AA93 | ANME-2d cluster              | <sup>13</sup> C peak in <sup>13</sup> CH <sub>4</sub> incubation | KX463088 |
| 13Cpeak_13CH4incub_94 | AA94 | uncultured Methanosaeta      | <sup>13</sup> C peak in <sup>13</sup> CH <sub>4</sub> incubation | KX463089 |
| 12Cpeak_13CH4incub_2  | AB2  | uncultured Thermoplasmatales | <sup>12</sup> C peak in <sup>13</sup> CH <sub>4</sub> incubation | KX463105 |
| 12Cpeak_13CH4incub_3  | AB3  | uncultured Crenarchaeote     | <sup>12</sup> C peak in <sup>13</sup> CH <sub>4</sub> incubation | KX463116 |
| 12Cpeak_13CH4incub_4  | AB4  | uncultured Crenarchaeote     | <sup>12</sup> C peak in <sup>13</sup> CH <sub>4</sub> incubation | KX463122 |
| 12Cpeak_13CH4incub_5  | AB5  | Uncultured Archaeon          | <sup>12</sup> C peak in <sup>13</sup> CH <sub>4</sub> incubation | KX463126 |
| 12Cpeak_13CH4incub_7  | AB7  | uncultured Crenarchaeote     | <sup>12</sup> C peak in <sup>13</sup> CH <sub>4</sub> incubation | KX463127 |
| 12Cpeak_13CH4incub_8  | AB8  | uncultured Methanosaeta      | <sup>12</sup> C peak in <sup>13</sup> CH <sub>4</sub> incubation | KX463128 |
| 12Cpeak_13CH4incub_9  | AB9  | uncultured Crenarchaeote     | <sup>12</sup> C peak in <sup>13</sup> CH <sub>4</sub> incubation | KX463129 |
| 12Cpeak_13CH4incub_10 | AB10 | uncultured Archaeon          | <sup>12</sup> C peak in <sup>13</sup> CH <sub>4</sub> incubation | KX463090 |

|                       |      |                              |                                                                  |          |
|-----------------------|------|------------------------------|------------------------------------------------------------------|----------|
| 12Cpeak_13CH4incub_11 | AB11 | uncultured Archaeon          | <sup>12</sup> C peak in <sup>13</sup> CH <sub>4</sub> incubation | KX463091 |
| 12Cpeak_13CH4incub_12 | AB12 | uncultured Crenarchaeote     | <sup>12</sup> C peak in <sup>13</sup> CH <sub>4</sub> incubation | KX463092 |
| 12Cpeak_13CH4incub_13 | AB13 | uncultured Archaeon          | <sup>12</sup> C peak in <sup>13</sup> CH <sub>4</sub> incubation | KX463093 |
| 12Cpeak_13CH4incub_16 | AB16 | uncultured Archaeon          | <sup>12</sup> C peak in <sup>13</sup> CH <sub>4</sub> incubation | KX463094 |
| 12Cpeak_13CH4incub_17 | AB17 | uncultured Crenarchaeote     | <sup>12</sup> C peak in <sup>13</sup> CH <sub>4</sub> incubation | KX463095 |
| 12Cpeak_13CH4incub_18 | AB18 | uncultured Archaeon          | <sup>12</sup> C peak in <sup>13</sup> CH <sub>4</sub> incubation | KX463096 |
| 12Cpeak_13CH4incub_19 | AB19 | uncultured Crenarchaeote     | <sup>12</sup> C peak in <sup>13</sup> CH <sub>4</sub> incubation | KX463097 |
| 12Cpeak_13CH4incub_20 | AB20 | uncultured Archaeon          | <sup>12</sup> C peak in <sup>13</sup> CH <sub>4</sub> incubation | KX463098 |
| 12Cpeak_13CH4incub_21 | AB21 | uncultured Crenarchaeote     | <sup>12</sup> C peak in <sup>13</sup> CH <sub>4</sub> incubation | KX463099 |
| 12Cpeak_13CH4incub_23 | AB23 | uncultured Crenarchaeote     | <sup>12</sup> C peak in <sup>13</sup> CH <sub>4</sub> incubation | KX463100 |
| 12Cpeak_13CH4incub_25 | AB25 | uncultured Thermoplasmatales | <sup>12</sup> C peak in <sup>13</sup> CH <sub>4</sub> incubation | KX463101 |
| 12Cpeak_13CH4incub_26 | AB26 | uncultured Crenarchaeote     | <sup>12</sup> C peak in <sup>13</sup> CH <sub>4</sub> incubation | KX463102 |
| 12Cpeak_13CH4incub_27 | AB27 | uncultured Crenarchaeote     | <sup>12</sup> C peak in <sup>13</sup> CH <sub>4</sub> incubation | KX463103 |
| 12Cpeak_13CH4incub_28 | AB28 | uncultured Thermoplasmatales | <sup>12</sup> C peak in <sup>13</sup> CH <sub>4</sub> incubation | KX463104 |
| 12Cpeak_13CH4incub_30 | AB30 | uncultured Crenarchaeote     | <sup>12</sup> C peak in <sup>13</sup> CH <sub>4</sub> incubation | KX463106 |
| 12Cpeak_13CH4incub_31 | AB31 | uncultured Thermoplasmatales | <sup>12</sup> C peak in <sup>13</sup> CH <sub>4</sub> incubation | KX463107 |
| 12Cpeak_13CH4incub_32 | AB32 | uncultured Crenarchaeote     | <sup>12</sup> C peak in <sup>13</sup> CH <sub>4</sub> incubation | KX463108 |
| 12Cpeak_13CH4incub_33 | AB33 | uncultured Crenarchaeote     | <sup>12</sup> C peak in <sup>13</sup> CH <sub>4</sub> incubation | KX463109 |
| 12Cpeak_13CH4incub_34 | AB34 | uncultured Crenarchaeote     | <sup>12</sup> C peak in <sup>13</sup> CH <sub>4</sub> incubation | KX463110 |
| 12Cpeak_13CH4incub_35 | AB35 | uncultured Archaeon          | <sup>12</sup> C peak in <sup>13</sup> CH <sub>4</sub> incubation | KX463111 |
| 12Cpeak_13CH4incub_36 | AB36 | uncultured Crenarchaeote     | <sup>12</sup> C peak in <sup>13</sup> CH <sub>4</sub> incubation | KX463112 |
| 12Cpeak_13CH4incub_37 | AB37 | uncultured Thermoplasmatales | <sup>12</sup> C peak in <sup>13</sup> CH <sub>4</sub> incubation | KX463113 |
| 12Cpeak_13CH4incub_38 | AB38 | uncultured Thermoplasmatales | <sup>12</sup> C peak in <sup>13</sup> CH <sub>4</sub> incubation | KX463114 |
| 12Cpeak_13CH4incub_39 | AB39 | uncultured Thermoplasmatales | <sup>12</sup> C peak in <sup>13</sup> CH <sub>4</sub> incubation | KX463115 |
| 12Cpeak_13CH4incub_40 | AB40 | uncultured Archaeon          | <sup>12</sup> C peak in <sup>13</sup> CH <sub>4</sub> incubation | KX463117 |
| 12Cpeak_13CH4incub_41 | AB41 | uncultured Crenarchaeote     | <sup>12</sup> C peak in <sup>13</sup> CH <sub>4</sub> incubation | KX463118 |
| 12Cpeak_13CH4incub_42 | AB42 | uncultured Crenarchaeote     | <sup>12</sup> C peak in <sup>13</sup> CH <sub>4</sub> incubation | KX463119 |
| 12Cpeak_13CH4incub_44 | AB44 | uncultured Archaeon          | <sup>12</sup> C peak in <sup>13</sup> CH <sub>4</sub> incubation | KX463120 |

|                        |      |                              |                                                                   |          |
|------------------------|------|------------------------------|-------------------------------------------------------------------|----------|
| 12Cpeak_13CH4incub_47  | AB47 | uncultured Thermoplasmatales | <sup>12</sup> C peak in <sup>13</sup> CH <sub>4</sub> incubation  | KX463121 |
| 12Cpeak_13CH4incub_50  | AB50 | uncultured Crenarchaeote     | <sup>12</sup> C peak in <sup>13</sup> CH <sub>4</sub> incubation  | KX463123 |
| 12Cpeak_13CH4incub_52  | AB52 | uncultured Crenarchaeote     | <sup>12</sup> C peak in <sup>13</sup> CH <sub>4</sub> incubation  | KX463124 |
| 12Cpeak_13CH4incub_53  | AB53 | ANME-2d cluster              | <sup>12</sup> C peak in <sup>13</sup> CH <sub>4</sub> incubation  | KX463125 |
| 13Cpeak_13CDICincub_7  | BA7  | ANME-2d cluster              | <sup>13</sup> C peak in <sup>13</sup> C <sub>DIC</sub> incubation | KX463153 |
| 13Cpeak_13CDICincub_10 | BA10 | ANME-2d cluster              | <sup>13</sup> C peak in <sup>13</sup> C <sub>DIC</sub> incubation | KX463130 |
| 13Cpeak_13CDICincub_11 | BA11 | uncultured Methanosaeta      | <sup>13</sup> C peak in <sup>13</sup> C <sub>DIC</sub> incubation | KX463131 |
| 13Cpeak_13CDICincub_16 | BA16 | uncultured Methanosaeta      | <sup>13</sup> C peak in <sup>13</sup> C <sub>DIC</sub> incubation | KX463132 |
| 13Cpeak_13CDICincub_25 | BA25 | ANME-2d cluster              | <sup>13</sup> C peak in <sup>13</sup> C <sub>DIC</sub> incubation | KX463133 |
| 13Cpeak_13CDICincub_28 | BA28 | ANME-2d cluster              | <sup>13</sup> C peak in <sup>13</sup> C <sub>DIC</sub> incubation | KX463134 |
| 13Cpeak_13CDICincub_30 | BA30 | uncultured Crenarchaeote     | <sup>13</sup> C peak in <sup>13</sup> C <sub>DIC</sub> incubation | KX463135 |
| 13Cpeak_13CDICincub_31 | BA31 | ANME-2d cluster              | <sup>13</sup> C peak in <sup>13</sup> C <sub>DIC</sub> incubation | KX463136 |
| 13Cpeak_13CDICincub_32 | BA32 | ANME-2d cluster              | <sup>13</sup> C peak in <sup>13</sup> C <sub>DIC</sub> incubation | KX463137 |
| 13Cpeak_13CDICincub_34 | BA34 | ANME-2d cluster              | <sup>13</sup> C peak in <sup>13</sup> C <sub>DIC</sub> incubation | KX463138 |
| 13Cpeak_13CDICincub_39 | BA39 | uncultured Crenarchaeote     | <sup>13</sup> C peak in <sup>13</sup> C <sub>DIC</sub> incubation | KX463139 |
| 13Cpeak_13CDICincub_40 | BA40 | ANME-2d cluster              | <sup>13</sup> C peak in <sup>13</sup> C <sub>DIC</sub> incubation | KX463140 |
| 13Cpeak_13CDICincub_43 | BA43 | ANME-2d cluster              | <sup>13</sup> C peak in <sup>13</sup> C <sub>DIC</sub> incubation | KX463141 |
| 13Cpeak_13CDICincub_49 | BA49 | uncultured Crenarchaeote     | <sup>13</sup> C peak in <sup>13</sup> C <sub>DIC</sub> incubation | KX463142 |
| 13Cpeak_13CDICincub_50 | BA50 | uncultured Methanolinea      | <sup>13</sup> C peak in <sup>13</sup> C <sub>DIC</sub> incubation | KX463143 |
| 13Cpeak_13CDICincub_55 | BA55 | ANME-2d cluster              | <sup>13</sup> C peak in <sup>13</sup> C <sub>DIC</sub> incubation | KX463144 |
| 13Cpeak_13CDICincub_56 | BA56 | uncultured Thermoplasmatales | <sup>13</sup> C peak in <sup>13</sup> C <sub>DIC</sub> incubation | KX463145 |
| 13Cpeak_13CDICincub_65 | BA65 | uncultured Methanolinea      | <sup>13</sup> C peak in <sup>13</sup> C <sub>DIC</sub> incubation | KX463146 |
| 13Cpeak_13CDICincub_67 | BA67 | ANME-2d cluster              | <sup>13</sup> C peak in <sup>13</sup> C <sub>DIC</sub> incubation | KX463147 |
| 13Cpeak_13CDICincub_69 | BA69 | ANME-2d cluster              | <sup>13</sup> C peak in <sup>13</sup> C <sub>DIC</sub> incubation | KX463148 |
| 13Cpeak_13CDICincub_74 | BA74 | ANME-2d cluster              | <sup>13</sup> C peak in <sup>13</sup> C <sub>DIC</sub> incubation | KX463149 |
| 13Cpeak_13CDICincub_75 | BA75 | uncultured Crenarchaeote     | <sup>13</sup> C peak in <sup>13</sup> C <sub>DIC</sub> incubation | KX463150 |
| 13Cpeak_13CDICincub_76 | BA76 | ANME-2d cluster              | <sup>13</sup> C peak in <sup>13</sup> C <sub>DIC</sub> incubation | KX463151 |
| 13Cpeak_13CDICincub_79 | BA79 | uncultured Methanosaeta      | <sup>13</sup> C peak in <sup>13</sup> C <sub>DIC</sub> incubation | KX463152 |



|                        |      |                              |                                                                   |          |
|------------------------|------|------------------------------|-------------------------------------------------------------------|----------|
| 13Cpeak_13CDICincub_80 | BA80 | ANME-2d cluster              | <sup>13</sup> C peak in <sup>13</sup> C <sub>DIC</sub> incubation | KX463154 |
| 13Cpeak_13CDICincub_84 | BA84 | ANME-2d cluster              | <sup>13</sup> C peak in <sup>13</sup> C <sub>DIC</sub> incubation | KX463155 |
| 13Cpeak_13CDICincub_89 | BA89 | ANME-2d cluster              | <sup>13</sup> C peak in <sup>13</sup> C <sub>DIC</sub> incubation | KX463156 |
| 13Cpeak_13CDICincub_90 | BA90 | uncultured Crenarchaeote     | <sup>13</sup> C peak in <sup>13</sup> C <sub>DIC</sub> incubation | KX463157 |
| 13Cpeak_13CDICincub_95 | BA95 | uncultured Thermoplasmatales | <sup>13</sup> C peak in <sup>13</sup> C <sub>DIC</sub> incubation | KX463158 |
| 12Cpeak_13CDICincub_5  | BB5  | uncultured Crenarchaeote     | <sup>12</sup> C peak in <sup>13</sup> C <sub>DIC</sub> incubation | KX463191 |
| 12Cpeak_13CDICincub_7  | BB7  | uncultured Crenarchaeote     | <sup>12</sup> C peak in <sup>13</sup> C <sub>DIC</sub> incubation | KX463192 |
| 12Cpeak_13CDICincub_8  | BB8  | uncultured Crenarchaeote     | <sup>12</sup> C peak in <sup>13</sup> C <sub>DIC</sub> incubation | KX463193 |
| 12Cpeak_13CDICincub_9  | BB9  | uncultured Crenarchaeote     | <sup>12</sup> C peak in <sup>13</sup> C <sub>DIC</sub> incubation | KX463194 |
| 12Cpeak_13CDICincub_10 | BB10 | uncultured Thermoplasmatales | <sup>12</sup> C peak in <sup>13</sup> C <sub>DIC</sub> incubation | KX463159 |
| 12Cpeak_13CDICincub_12 | BB12 | uncultured Thermoplasmatales | <sup>12</sup> C peak in <sup>13</sup> C <sub>DIC</sub> incubation | KX463160 |
| 12Cpeak_13CDICincub_13 | BB13 | uncultured Archaeon          | <sup>12</sup> C peak in <sup>13</sup> C <sub>DIC</sub> incubation | KX463161 |
| 12Cpeak_13CDICincub_14 | BB14 | uncultured Crenarchaeote     | <sup>12</sup> C peak in <sup>13</sup> C <sub>DIC</sub> incubation | KX463162 |
| 12Cpeak_13CDICincub_16 | BB16 | uncultured Crenarchaeote     | <sup>12</sup> C peak in <sup>13</sup> C <sub>DIC</sub> incubation | KX463163 |
| 12Cpeak_13CDICincub_18 | BB18 | uncultured Crenarchaeote     | <sup>12</sup> C peak in <sup>13</sup> C <sub>DIC</sub> incubation | KX463164 |
| 12Cpeak_13CDICincub_20 | BB20 | uncultured Crenarchaeote     | <sup>12</sup> C peak in <sup>13</sup> C <sub>DIC</sub> incubation | KX463165 |
| 12Cpeak_13CDICincub_21 | BB21 | uncultured Crenarchaeote     | <sup>12</sup> C peak in <sup>13</sup> C <sub>DIC</sub> incubation | KX463166 |
| 12Cpeak_13CDICincub_22 | BB22 | uncultured Crenarchaeote     | <sup>12</sup> C peak in <sup>13</sup> C <sub>DIC</sub> incubation | KX463167 |
| 12Cpeak_13CDICincub_23 | BB23 | uncultured Crenarchaeote     | <sup>12</sup> C peak in <sup>13</sup> C <sub>DIC</sub> incubation | KX463168 |
| 12Cpeak_13CDICincub_25 | BB25 | uncultured Crenarchaeote     | <sup>12</sup> C peak in <sup>13</sup> C <sub>DIC</sub> incubation | KX463169 |
| 12Cpeak_13CDICincub_27 | BB27 | uncultured Archaeon          | <sup>12</sup> C peak in <sup>13</sup> C <sub>DIC</sub> incubation | KX463170 |
| 12Cpeak_13CDICincub_29 | BB29 | uncultured Crenarchaeote     | <sup>12</sup> C peak in <sup>13</sup> C <sub>DIC</sub> incubation | KX463171 |
| 12Cpeak_13CDICincub_30 | BB30 | uncultured Archaeon          | <sup>12</sup> C peak in <sup>13</sup> C <sub>DIC</sub> incubation | KX463172 |
| 12Cpeak_13CDICincub_34 | BB34 | uncultured Archaeon          | <sup>12</sup> C peak in <sup>13</sup> C <sub>DIC</sub> incubation | KX463173 |
| 12Cpeak_13CDICincub_37 | BB37 | uncultured Crenarchaeote     | <sup>12</sup> C peak in <sup>13</sup> C <sub>DIC</sub> incubation | KX463174 |
| 12Cpeak_13CDICincub_38 | BB38 | uncultured Crenarchaeote     | <sup>12</sup> C peak in <sup>13</sup> C <sub>DIC</sub> incubation | KX463175 |
| 12Cpeak_13CDICincub_41 | BB41 | uncultured Crenarchaeote     | <sup>12</sup> C peak in <sup>13</sup> C <sub>DIC</sub> incubation | KX463176 |
| 12Cpeak_13CDICincub_42 | BB42 | uncultured Archaeon          | <sup>12</sup> C peak in <sup>13</sup> C <sub>DIC</sub> incubation | KX463177 |

|                        |      |                              |                                                                   |          |
|------------------------|------|------------------------------|-------------------------------------------------------------------|----------|
| 12Cpeak_13CDICincub_43 | BB43 | uncultured Archaeon          | <sup>12</sup> C peak in <sup>13</sup> C <sub>DIC</sub> incubation | KX463178 |
| 12Cpeak_13CDICincub_45 | BB45 | uncultured Thermoplasmatales | <sup>12</sup> C peak in <sup>13</sup> C <sub>DIC</sub> incubation | KX463179 |
| 12Cpeak_13CDICincub_46 | BB46 | uncultured Archaeon          | <sup>12</sup> C peak in <sup>13</sup> C <sub>DIC</sub> incubation | KX463180 |
| 12Cpeak_13CDICincub_47 | BB47 | uncultured Thermoplasmatales | <sup>12</sup> C peak in <sup>13</sup> C <sub>DIC</sub> incubation | KX463181 |
| 12Cpeak_13CDICincub_48 | BB48 | uncultured Archaeon          | <sup>12</sup> C peak in <sup>13</sup> C <sub>DIC</sub> incubation | KX463182 |
| 12Cpeak_13CDICincub_49 | BB49 | uncultured Thermoplasmatales | <sup>12</sup> C peak in <sup>13</sup> C <sub>DIC</sub> incubation | KX463183 |
| 12Cpeak_13CDICincub_50 | BB50 | uncultured Crenarchaeote     | <sup>12</sup> C peak in <sup>13</sup> C <sub>DIC</sub> incubation | KX463184 |
| 12Cpeak_13CDICincub_51 | BB51 | uncultured Crenarchaeote     | <sup>12</sup> C peak in <sup>13</sup> C <sub>DIC</sub> incubation | KX463185 |
| 12Cpeak_13CDICincub_54 | BB54 | uncultured Crenarchaeote     | <sup>12</sup> C peak in <sup>13</sup> C <sub>DIC</sub> incubation | KX463186 |
| 12Cpeak_13CDICincub_55 | BB55 | uncultured Thermoplasmatales | <sup>12</sup> C peak in <sup>13</sup> C <sub>DIC</sub> incubation | KX463187 |
| 12Cpeak_13CDICincub_56 | BB56 | uncultured Crenarchaeote     | <sup>12</sup> C peak in <sup>13</sup> C <sub>DIC</sub> incubation | KX463188 |
| 12Cpeak_13CDICincub_57 | BB57 | uncultured Archaeon          | <sup>12</sup> C peak in <sup>13</sup> C <sub>DIC</sub> incubation | KX463189 |
| 12Cpeak_13CDICincub_58 | BB58 | uncultured Crenarchaeote     | <sup>12</sup> C peak in <sup>13</sup> C <sub>DIC</sub> incubation | KX463190 |
